# Supplementary material
Source: Springer Nature journal article supplement (https://www.springermedizin.de/resource/supplementary/12916_2012_703_MOESM5_ESM.pdf/9598616)

**Marsal**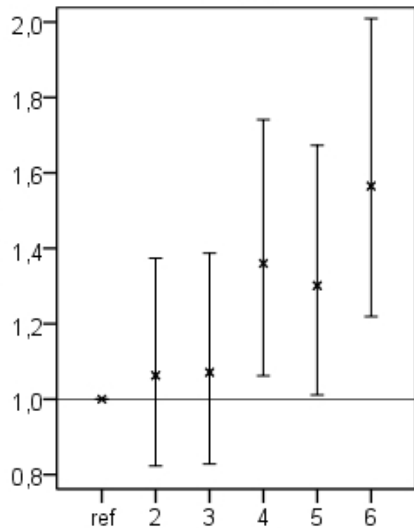**Skjaerven**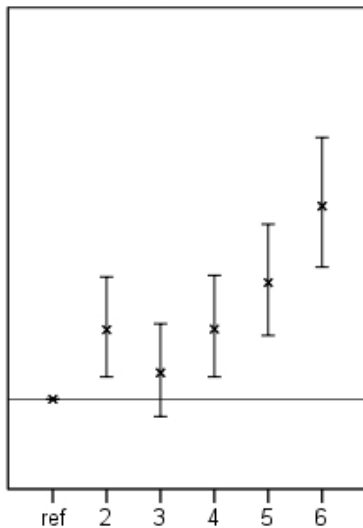**Gardosi**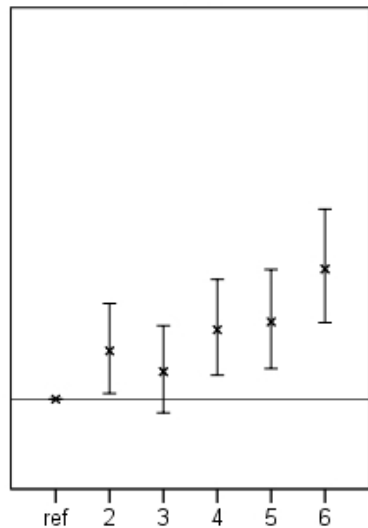

Supplement: MOESM5 [file 9598616]
